# Supplementary material for: A vacuum ultraviolet photoionization study on the formation of methanimine (CH2NH) and ethylenediamine (NH2CH2CH2NH2) in low temperature interstellar model ices exposed to ionizing radiation
Source: Royal Society of Chemistry journal article supplement (doi:10.1039/c8cp06002a), 2018-12-20
Supplement: c8cp06002a1.pdf [file c8cp06002a1.pdf]

## Supplementary information for

# A Vacuum Ultraviolet Photoionization Study on the Formation of Methanimine ( $\text{CH}_2\text{NH}$ ) and Ethylenediamine ( $\text{NH}_2\text{CH}_2\text{CH}_2\text{NH}_2$ ) in Low Temperature Interstellar Model Ices Exposed to Ionizing Radiation

Cheng Zhu,<sup>‡ab</sup> Robert Frigge,<sup>‡ab</sup> Andrew M. Turner,<sup>ab</sup> Matthew J. Abplanalp,<sup>ab</sup> Bing-Jian Sun,<sup>c</sup>  
Yue-Lin Chen,<sup>c</sup> Agnes H. H. Chang<sup>c</sup> and Ralf I. Kaiser<sup>\*ab</sup>

<sup>a</sup> W. M. Keck Research Laboratory in Astrochemistry, University of Hawaii at Manoa, Honolulu, Hawaii 96822, USA; [ralfk@hawaii.edu](mailto:ralfk@hawaii.edu)

<sup>b</sup> Department of Chemistry, University of Hawaii at Manoa, Honolulu, Hawaii 96822, USA

<sup>c</sup> Department of Chemistry, National Dong Hwa University, Shoufeng, Hualien 974, Taiwan

<sup>‡</sup> These authors contributed equally.

**Table S1** Data applied to calculate the irradiation dose per molecule. \* values from CASINO simulations, § derived values based on 15 nA, 20 min irradiation of CH<sub>3</sub>NH<sub>2</sub>.

|                                                                       |                                    |
|-----------------------------------------------------------------------|------------------------------------|
| initial kinetic energy of the electrons, $E_{\text{init}}$            | 5 keV                              |
| irradiation current, I                                                | $20 \pm 2$ nA                      |
| total number of electrons                                             | $(1.1 \pm 0.3) \times 10^{14}$     |
| average kinetic energy of backscattered electrons, $E_{\text{bs}}^*$  | $3.1 \pm 0.3$ keV                  |
| fraction of backscattered electrons, $f_{\text{bs}}^*$                | $0.3 \pm 0.1$                      |
| average kinetic energy of transmitted electrons, $E_{\text{trans}}^*$ | $2.9 \pm 0.3$ keV                  |
| fraction of transmitted electrons, $f_{\text{trans}}^*$               | 0.5                                |
| average penetration depth, $l^*$                                      | $180 \pm 80$ nm                    |
| density of the ice, $\rho$                                            | $0.85 \pm 0.05$ g cm <sup>-3</sup> |
| irradiated area, A                                                    | $1.0 \pm 0.1$ cm <sup>2</sup>      |
| total number of molecules processed <sup>§</sup>                      | $(3 \pm 1) \times 10^{17}$         |
| dose per molecule, $D^{\S}$                                           | $1.0 \pm 0.1$ eV                   |

**Table S2** Theoretical values for the molecule geometry of CNH<sub>3</sub> and C<sub>2</sub>N<sub>2</sub>H<sub>8</sub> isomers and their ions.

|                                         |           |           |           |                                                     |           |           |           |
|-----------------------------------------|-----------|-----------|-----------|-----------------------------------------------------|-----------|-----------|-----------|
| Atom                                    | X         | Y         | Z         | Atom                                                | X         | Y         | Z         |
| <b>H<sub>2</sub>CNH</b>                 |           |           |           | <b>H<sub>2</sub>CNH<sup>+</sup></b>                 |           |           |           |
| C                                       | 0.584348  | 0.028954  | 0.000407  | C                                                   | 0.598498  | 0.023834  | -0.000021 |
| H                                       | -1.166258 | 0.735956  | -0.000251 | H                                                   | -1.561096 | 0.309440  | -0.000069 |
| H                                       | 1.075482  | 1.006604  | -0.000763 | H                                                   | 1.071217  | 1.022722  | 0.000044  |
| H                                       | 1.244023  | -0.838535 | -0.000968 | H                                                   | 1.245402  | -0.864826 | 0.000009  |
| N                                       | -0.665619 | -0.153964 | -0.000066 | N                                                   | -0.620931 | -0.087191 | 0.000021  |
| Atom                                    | X         | Y         | Z         | Atom                                                | X         | Y         | Z         |
| <b><sup>3</sup>CH<sub>3</sub>N</b>      |           |           |           | <b><sup>3</sup>CH<sub>3</sub>N<sup>+</sup></b>      |           |           |           |
| C                                       | 0.000000  | 0.000000  | -0.542736 | C                                                   | 0.000000  | 0.000000  | -0.661067 |
| H                                       | 0.000000  | 1.027837  | -0.935418 | H                                                   | 0.000000  | 1.076160  | -0.862293 |
| H                                       | -0.890133 | -0.513918 | -0.935418 | H                                                   | -0.931982 | -0.538080 | -0.862293 |
| H                                       | 0.890133  | -0.513918 | -0.935418 | H                                                   | 0.931982  | -0.538080 | -0.862293 |
| N                                       | 0.000000  | 0.000000  | 0.866096  | N                                                   | 0.000000  | 0.000000  | 0.936183  |
| Atom                                    | X         | Y         | Z         | Atom                                                | X         | Y         | Z         |
| <b>CHNH<sub>2</sub></b>                 |           |           |           | <b>CHNH<sub>2</sub><sup>+</sup></b>                 |           |           |           |
| C                                       | -0.763425 | 0.191020  | -0.000052 | C                                                   | -0.708468 | 0.155030  | -0.000061 |
| H                                       | -1.247136 | -0.803479 | 0.000169  | H                                                   | -1.572427 | -0.505327 | 0.000151  |
| N                                       | 0.525142  | -0.024423 | 0.000051  | N                                                   | 0.527230  | -0.030424 | 0.000071  |
| H                                       | 1.162890  | 0.760881  | 0.000002  | H                                                   | 1.183835  | 0.756126  | -0.000072 |
| H                                       | 0.988801  | -0.932556 | -0.000216 | H                                                   | 0.948786  | -0.968009 | -0.000209 |
| Atom                                    | X         | Y         | Z         | Atom                                                | X         | Y         | Z         |
| <b><sup>3</sup>CHNH<sub>2</sub></b>     |           |           |           | <b><sup>3</sup>CHNH<sub>2</sub><sup>+</sup></b>     |           |           |           |
| C                                       | -0.768492 | -0.000134 | 0.172029  | C                                                   | -0.849378 | 0.000034  | 0.156575  |
| H                                       | -1.560245 | 0.000521  | -0.576784 | H                                                   | -1.468652 | -0.000260 | -0.741014 |
| N                                       | 0.571054  | -0.000018 | -0.107523 | N                                                   | 0.616161  | -0.000017 | 0.018755  |
| H                                       | 1.086806  | 0.834059  | 0.148853  | H                                                   | 1.125711  | 0.875811  | -0.164974 |
| H                                       | 1.087013  | -0.833653 | 0.148415  | H                                                   | 1.126085  | -0.875639 | -0.164752 |
| Atom                                    | X         | Y         | Z         | Atom                                                | X         | Y         | Z         |
| <b>CH<sub>3</sub>NHNHCH<sub>3</sub></b> |           |           |           | <b>CH<sub>3</sub>NHNHCH<sub>3</sub><sup>+</sup></b> |           |           |           |
| C                                       | -0.016087 | 1.827841  | 0.099439  | C                                                   | -0.057850 | 1.881992  | 0.132329  |
| H                                       | 0.653402  | 2.003275  | 0.944607  | H                                                   | 0.649709  | 1.977094  | 0.954431  |
| H                                       | 0.205281  | 2.581493  | -0.656072 | H                                                   | 0.228114  | 2.564111  | -0.663288 |
| H                                       | -1.048326 | 1.952461  | 0.449831  | H                                                   | -1.065870 | 2.120303  | 0.477022  |
| N                                       | 0.249943  | 0.509348  | -0.466674 | N                                                   | -0.002265 | 0.526287  | -0.399047 |
| H                                       | -0.350222 | 0.404574  | -1.280016 | H                                                   | -0.296266 | 0.340675  | -1.350792 |
| N                                       | -0.249943 | -0.509348 | 0.466674  | N                                                   | 0.002265  | -0.526287 | 0.399047  |
| H                                       | 0.350222  | -0.404574 | 1.280016  | H                                                   | 0.296266  | -0.340675 | 1.350792  |

|                                                                 |           |           |           |                                                                             |           |           |           |
|-----------------------------------------------------------------|-----------|-----------|-----------|-----------------------------------------------------------------------------|-----------|-----------|-----------|
| C                                                               | 0.016087  | -1.827841 | -0.099439 | C                                                                           | 0.057850  | -1.881992 | -0.132329 |
| H                                                               | 1.048326  | -1.952461 | -0.449831 | H                                                                           | 1.065870  | -2.120303 | -0.477022 |
| H                                                               | -0.205281 | -2.581493 | 0.656072  | H                                                                           | -0.228114 | -2.564111 | 0.663288  |
| H                                                               | -0.653402 | -2.003275 | -0.944607 | H                                                                           | -0.649709 | -1.977094 | -0.954431 |
| Atom                                                            | X         | Y         | Z         | Atom                                                                        | X         | Y         | Z         |
| <b>H<sub>2</sub>NCH<sub>2</sub>CH<sub>2</sub>NH<sub>2</sub></b> |           |           |           | <b>H<sub>2</sub>NCH<sub>2</sub>CH<sub>2</sub>NH<sub>2</sub><sup>+</sup></b> |           |           |           |
| N                                                               | 1.467235  | -0.558223 | -0.238485 | N                                                                           | 1.649073  | -0.482818 | -0.106493 |
| H                                                               | 2.352613  | -0.666632 | 0.239672  | H                                                                           | 2.163214  | -0.404393 | -0.970051 |
| H                                                               | 0.922827  | -1.396268 | -0.067161 | H                                                                           | 1.692992  | -1.372142 | 0.365271  |
| C                                                               | 0.725558  | 0.587047  | 0.284633  | C                                                                           | 0.869475  | 0.527303  | 0.347502  |
| H                                                               | 1.237868  | 1.506806  | -0.008397 | H                                                                           | 1.159132  | 1.509213  | -0.013010 |
| H                                                               | 0.648177  | 0.603502  | 1.384140  | H                                                                           | 0.647637  | 0.483105  | 1.407339  |
| C                                                               | -0.681973 | 0.600997  | -0.297080 | C                                                                           | -0.869467 | 0.527333  | -0.347489 |
| H                                                               | -1.175813 | 1.543276  | -0.025829 | H                                                                           | -1.159102 | 1.509233  | 0.013070  |
| H                                                               | -0.603702 | 0.569982  | -1.384980 | H                                                                           | -0.647638 | 0.483171  | -1.407330 |
| N                                                               | -1.419651 | -0.594061 | 0.133800  | N                                                                           | -1.649103 | -0.482808 | 0.106466  |
| H                                                               | -1.724299 | -0.496049 | 1.095300  | H                                                                           | -2.163045 | -0.404507 | 0.970153  |
| H                                                               | -2.252264 | -0.726897 | -0.425272 | H                                                                           | -1.693030 | -1.372111 | -0.365331 |
| Atom                                                            | X         | Y         | Z         | Atom                                                                        | X         | Y         | Z         |
| <b>H<sub>2</sub>NCH<sub>2</sub>NHCH<sub>3</sub></b>             |           |           |           | <b>H<sub>2</sub>NCH<sub>2</sub>NHCH<sub>3</sub><sup>+</sup></b>             |           |           |           |
| N                                                               | -1.460052 | -0.588360 | -0.115897 | N                                                                           | -1.350176 | -0.650407 | -0.007934 |
| H                                                               | -2.302382 | -0.661056 | 0.440246  | H                                                                           | -1.612240 | -1.020626 | 0.893078  |
| H                                                               | -1.728228 | -0.501483 | -1.088763 | H                                                                           | -2.064393 | -0.813112 | -0.699780 |
| C                                                               | -0.663079 | 0.563795  | 0.288990  | C                                                                           | -0.792651 | 0.639634  | -0.008171 |
| H                                                               | -0.568907 | 0.512536  | 1.386199  | H                                                                           | -1.060042 | 1.262483  | 0.862094  |
| H                                                               | -1.121452 | 1.531975  | 0.046790  | H                                                                           | -1.077541 | 1.228444  | -0.888505 |
| N                                                               | 0.617793  | 0.523231  | -0.390331 | N                                                                           | 0.681601  | 0.622304  | 0.007315  |
| H                                                               | 1.046401  | 1.438247  | -0.364617 | H                                                                           | 1.140402  | 1.522759  | 0.134171  |
| C                                                               | 1.536167  | -0.490360 | 0.113919  | C                                                                           | 1.497535  | -0.547831 | -0.033942 |
| H                                                               | 2.462071  | -0.463399 | -0.460416 | H                                                                           | 2.431510  | -0.319606 | -0.547820 |
| H                                                               | 1.784731  | -0.369104 | 1.179809  | H                                                                           | 1.757270  | -0.853577 | 0.992699  |
| H                                                               | 1.085060  | -1.472425 | -0.013101 | H                                                                           | 0.935754  | -1.360861 | -0.488921 |
| Atom                                                            | X         | Y         | Z         | Atom                                                                        | X         | Y         | Z         |
| <b>(CH<sub>3</sub>)<sub>2</sub>NNH<sub>2</sub></b>              |           |           |           | <b>(CH<sub>3</sub>)<sub>2</sub>NNH<sub>2</sub><sup>+</sup></b>              |           |           |           |
| N                                                               | -0.328929 | 0.239419  | 0.000000  | N                                                                           | -0.105641 | 0.050367  | 0.000000  |
| C                                                               | -0.328929 | -0.587433 | 1.196851  | C                                                                           | -0.105641 | -0.670272 | 1.268283  |
| H                                                               | -0.345336 | 0.048620  | 2.083676  | H                                                                           | -0.378963 | 0.006386  | 2.075107  |
| H                                                               | -1.232089 | -1.196438 | 1.205462  | H                                                                           | -0.833915 | -1.473896 | 1.205842  |
| H                                                               | 0.552509  | -1.243562 | 1.256237  | H                                                                           | 0.885488  | -1.089656 | 1.458005  |
| C                                                               | -0.328929 | -0.587433 | -1.196851 | C                                                                           | -0.105641 | -0.670272 | -1.268283 |
| H                                                               | -1.232089 | -1.196438 | -1.205462 | H                                                                           | -0.833915 | -1.473896 | -1.205842 |
| H                                                               | -0.345336 | 0.048620  | -2.083676 | H                                                                           | -0.378963 | 0.006386  | -2.075107 |

|   |          |           |           |   |          |           |           |
|---|----------|-----------|-----------|---|----------|-----------|-----------|
| H | 0.552509 | -1.243562 | -1.256237 | H | 0.885488 | -1.089656 | -1.458005 |
| N | 0.937043 | 0.989579  | 0.000000  | N | 0.312886 | 1.308805  | 0.000000  |
| H | 0.870093 | 1.614486  | -0.801011 | H | 0.235876 | 1.821698  | -0.868229 |
| H | 0.870093 | 1.614486  | 0.801011  | H | 0.235876 | 1.821698  | 0.868229  |

**Table S3** Theoretical infrared frequency modes for the CNH<sub>3</sub> and C<sub>2</sub>N<sub>2</sub>H<sub>8</sub> isomers and their ions.

| H <sub>2</sub> CNH             |                              |              | H <sub>2</sub> CNH <sup>+</sup>             |                              |              |
|--------------------------------|------------------------------|--------------|---------------------------------------------|------------------------------|--------------|
| Normal modes                   | Frequency(cm <sup>-1</sup> ) | IR Intensity | Normal modes                                | Frequency(cm <sup>-1</sup> ) | IR Intensity |
| v <sub>1</sub>                 | 1075.5062                    | 37.0005      | v <sub>1</sub>                              | 582.8914                     | 118.9476     |
| v <sub>2</sub>                 | 1101.4124                    | 15.5365      | v <sub>2</sub>                              | 633.3062                     | 132.9916     |
| v <sub>3</sub>                 | 1170.0398                    | 45.5313      | v <sub>3</sub>                              | 987.4739                     | 10.3758      |
| v <sub>4</sub>                 | 1373.3046                    | 46.9702      | v <sub>4</sub>                              | 1058.5386                    | 53.2054      |
| v <sub>5</sub>                 | 1492.8412                    | 6.5260       | v <sub>5</sub>                              | 1341.6707                    | 63.0830      |
| v <sub>6</sub>                 | 1713.0952                    | 21.6437      | v <sub>6</sub>                              | 1730.4488                    | 0.4752       |
| v <sub>7</sub>                 | 3010.4982                    | 52.4169      | v <sub>7</sub>                              | 2914.2190                    | 105.7087     |
| v <sub>8</sub>                 | 3103.8095                    | 36.8335      | v <sub>8</sub>                              | 3028.5777                    | 87.9035      |
| v <sub>9</sub>                 | 3425.8292                    | 1.0857       | v <sub>9</sub>                              | 3507.1840                    | 387.2770     |
| <sup>3</sup> CH <sub>3</sub> N |                              |              | <sup>3</sup> CH <sub>3</sub> N <sup>+</sup> |                              |              |
| Normal modes                   | Frequency(cm <sup>-1</sup> ) | IR Intensity | Normal modes                                | Frequency(cm <sup>-1</sup> ) | IR Intensity |
| v <sub>1</sub>                 | 963.5507                     | 0.7019       | v <sub>1</sub>                              | 466.3037                     | 8.6117       |
| v <sub>2</sub>                 | 963.5524                     | 0.7019       | v <sub>2</sub>                              | 898.2116                     | 7.7179       |
| v <sub>3</sub>                 | 1053.8599                    | 4.9809       | v <sub>3</sub>                              | 898.2128                     | 7.7178       |
| v <sub>4</sub>                 | 1379.2879                    | 13.3115      | v <sub>4</sub>                              | 1320.4751                    | 0.1288       |
| v <sub>5</sub>                 | 1419.7884                    | 9.9782       | v <sub>5</sub>                              | 1352.6705                    | 13.6947      |
| v <sub>6</sub>                 | 1419.7887                    | 9.9775       | v <sub>6</sub>                              | 1352.672                     | 13.6931      |
| v <sub>7</sub>                 | 2924.4886                    | 2.4306       | v <sub>7</sub>                              | 2968.3363                    | 63.0607      |
| v <sub>8</sub>                 | 2979.3148                    | 14.2024      | v <sub>8</sub>                              | 3112.1254                    | 89.7423      |
| v <sub>9</sub>                 | 2979.315                     | 14.2047      | v <sub>9</sub>                              | 3112.1258                    | 89.7373      |
| CHNH <sub>2</sub>              |                              |              | CHNH <sub>2</sub> <sup>+</sup>              |                              |              |
| Normal modes                   | Frequency(cm <sup>-1</sup> ) | IR Intensity | Normal modes                                | Frequency(cm <sup>-1</sup> ) | IR Intensity |
| v <sub>1</sub>                 | 801.4767                     | 147.4518     | v <sub>1</sub>                              | 845.2991                     | 35.7408      |
| v <sub>2</sub>                 | 1075.3634                    | 25.535       | v <sub>2</sub>                              | 893.2671                     | 182.5151     |
| v <sub>3</sub>                 | 1159.0683                    | 12.2723      | v <sub>3</sub>                              | 965.3992                     | 42.6828      |
| v <sub>4</sub>                 | 1387.5623                    | 12.7364      | v <sub>4</sub>                              | 1177.4118                    | 15.2562      |
| v <sub>5</sub>                 | 1438.5902                    | 13.3644      | v <sub>5</sub>                              | 1565.7474                    | 30.102       |
| v <sub>6</sub>                 | 1686.9227                    | 11.4576      | v <sub>6</sub>                              | 1728.7476                    | 91.2312      |
| v <sub>7</sub>                 | 2913.9804                    | 110.6138     | v <sub>7</sub>                              | 3172.483                     | 60.0396      |
| v <sub>8</sub>                 | 3369.3698                    | 22.9474      | v <sub>8</sub>                              | 3337.5861                    | 159.5816     |
| v <sub>9</sub>                 | 3534.9723                    | 15.4043      | v <sub>9</sub>                              | 3439.4942                    | 216.8281     |

| ${}^3\text{CHNH}_2$          |                               |              | ${}^3\text{CHNH}_2^+$          |                               |              |
|------------------------------|-------------------------------|--------------|--------------------------------|-------------------------------|--------------|
| Normal modes                 | Frequency( $\text{cm}^{-1}$ ) | IR Intensity | Normal modes                   | Frequency( $\text{cm}^{-1}$ ) | IR Intensity |
| v <sub>1</sub>               | 520.137                       | 30.9842      | v <sub>1</sub>                 | 569.0733                      | 17.2517      |
| v <sub>2</sub>               | 610.4615                      | 219.6403     | v <sub>2</sub>                 | 715.1091                      | 116.3377     |
| v <sub>3</sub>               | 1070.3104                     | 17.7116      | v <sub>3</sub>                 | 955.8706                      | 34.4621      |
| v <sub>4</sub>               | 1099.6283                     | 1.1623       | v <sub>4</sub>                 | 972.5576                      | 8.0127       |
| v <sub>5</sub>               | 1267.8758                     | 18.2884      | v <sub>5</sub>                 | 1110.2469                     | 3.7313       |
| v <sub>6</sub>               | 1625.8034                     | 22.7909      | v <sub>6</sub>                 | 1555.383                      | 42.3441      |
| v <sub>7</sub>               | 3063.6355                     | 30.2464      | v <sub>7</sub>                 | 3104.1286                     | 49.0516      |
| v <sub>8</sub>               | 3464.8578                     | 3.4299       | v <sub>8</sub>                 | 3316.4336                     | 80.4391      |
| v <sub>9</sub>               | 3531.5805                     | 14.6469      | v <sub>9</sub>                 | 3421.6898                     | 194.3654     |
| $\text{CH}_3\text{NHNHCH}_3$ |                               |              | $\text{CH}_3\text{NHNHCH}_3^+$ |                               |              |
| Normal modes                 | Frequency( $\text{cm}^{-1}$ ) | IR Intensity | Normal modes                   | Frequency( $\text{cm}^{-1}$ ) | IR Intensity |
| v <sub>1</sub>               | 49.7107                       | 6.3924       | v <sub>1</sub>                 | 112.8545                      | 0.0751       |
| v <sub>2</sub>               | 234.2774                      | 0.9594       | v <sub>2</sub>                 | 148.8191                      | 3.1889       |
| v <sub>3</sub>               | 285.3485                      | 0.0000       | v <sub>3</sub>                 | 155.5647                      | 0.0000       |
| v <sub>4</sub>               | 292.0175                      | 5.1310       | v <sub>4</sub>                 | 294.0692                      | 1.9831       |
| v <sub>5</sub>               | 474.4309                      | 0.0000       | v <sub>5</sub>                 | 402.9769                      | 0.0000       |
| v <sub>6</sub>               | 815.9057                      | 0.0000       | v <sub>6</sub>                 | 511.8491                      | 0.0000       |
| v <sub>7</sub>               | 892.8219                      | 132.1914     | v <sub>7</sub>                 | 590.0594                      | 168.2007     |
| v <sub>8</sub>               | 960.6316                      | 0.0000       | v <sub>8</sub>                 | 922.7047                      | 0.0000       |
| v <sub>9</sub>               | 1044.4290                     | 25.9933      | v <sub>9</sub>                 | 1026.3576                     | 14.7526      |
| v <sub>10</sub>              | 1106.7215                     | 0.0000       | v <sub>10</sub>                | 1121.8020                     | 24.6704      |
| v <sub>11</sub>              | 1108.4551                     | 14.1059      | v <sub>11</sub>                | 1123.8278                     | 0.0000       |
| v <sub>12</sub>              | 1151.7854                     | 12.4246      | v <sub>12</sub>                | 1128.0659                     | 1.6143       |
| v <sub>13</sub>              | 1181.2046                     | 0.0000       | v <sub>13</sub>                | 1220.7657                     | 0.0000       |
| v <sub>14</sub>              | 1292.2594                     | 0.0000       | v <sub>14</sub>                | 1402.7582                     | 0.0000       |
| v <sub>15</sub>              | 1431.1926                     | 5.1148       | v <sub>15</sub>                | 1432.3455                     | 12.6587      |
| v <sub>16</sub>              | 1446.5412                     | 4.7441       | v <sub>16</sub>                | 1464.1766                     | 5.2859       |
| v <sub>17</sub>              | 1446.7211                     | 0.0000       | v <sub>17</sub>                | 1468.4634                     | 0.0000       |
| v <sub>18</sub>              | 1479.2835                     | 0.0000       | v <sub>18</sub>                | 1476.7806                     | 29.2365      |
| v <sub>19</sub>              | 1483.8601                     | 13.7356      | v <sub>19</sub>                | 1479.2059                     | 0.0000       |
| v <sub>20</sub>              | 1515.4655                     | 22.3501      | v <sub>20</sub>                | 1500.0455                     | 0.0000       |
| v <sub>21</sub>              | 1517.1866                     | 0.0000       | v <sub>21</sub>                | 1505.3241                     | 65.2002      |
| v <sub>22</sub>              | 1538.4557                     | 0.0000       | v <sub>22</sub>                | 1612.1145                     | 0.0000       |
| v <sub>23</sub>              | 2973.5900                     | 160.9774     | v <sub>23</sub>                | 3038.1648                     | 0.0000       |
| v <sub>24</sub>              | 2976.7763                     | 0.0000       | v <sub>24</sub>                | 3038.5829                     | 2.2985       |

| v <sub>25</sub>                                  | 3046.5231                    | 78.8358      | v <sub>25</sub>                                               | 3116.4385                    | 0.2815       |
|--------------------------------------------------|------------------------------|--------------|---------------------------------------------------------------|------------------------------|--------------|
| v <sub>26</sub>                                  | 3046.6431                    | 0.0000       | v <sub>26</sub>                                               | 3117.2818                    | 0.0000       |
| v <sub>27</sub>                                  | 3095.6242                    | 50.5520      | v <sub>27</sub>                                               | 3156.6600                    | 1.2636       |
| v <sub>28</sub>                                  | 3095.7023                    | 0.0000       | v <sub>28</sub>                                               | 3157.0660                    | 0.0000       |
| v <sub>29</sub>                                  | 3450.0833                    | 0.0000       | v <sub>29</sub>                                               | 3548.2904                    | 0.0000       |
| v <sub>30</sub>                                  | 3471.0086                    | 0.0657       | v <sub>30</sub>                                               | 3557.5745                    | 168.3875     |
| (CH <sub>3</sub> ) <sub>2</sub> NNH <sub>2</sub> |                              |              | (CH <sub>3</sub> ) <sub>2</sub> NNH <sub>2</sub> <sup>+</sup> |                              |              |
| Normal modes                                     | Frequency(cm <sup>-1</sup> ) | IR Intensity | Normal modes                                                  | Frequency(cm <sup>-1</sup> ) | IR Intensity |
| v <sub>1</sub>                                   | 164.5265                     | 36.2334      | v <sub>1</sub>                                                | 100.5343                     | 0.0109       |
| v <sub>2</sub>                                   | 262.6485                     | 7.0780       | v <sub>2</sub>                                                | 137.5117                     | 0.3196       |
| v <sub>3</sub>                                   | 274.4501                     | 0.0136       | v <sub>3</sub>                                                | 291.3740                     | 11.5028      |
| v <sub>4</sub>                                   | 408.7494                     | 4.3265       | v <sub>4</sub>                                                | 404.9324                     | 10.2624      |
| v <sub>5</sub>                                   | 436.2408                     | 1.8204       | v <sub>5</sub>                                                | 409.7203                     | 3.1825       |
| v <sub>6</sub>                                   | 439.5743                     | 16.7883      | v <sub>6</sub>                                                | 468.9608                     | 0.0372       |
| v <sub>7</sub>                                   | 811.4670                     | 14.3654      | v <sub>7</sub>                                                | 527.4746                     | 191.1342     |
| v <sub>8</sub>                                   | 982.7986                     | 20.2362      | v <sub>8</sub>                                                | 798.0330                     | 1.1307       |
| v <sub>9</sub>                                   | 1039.6479                    | 14.8111      | v <sub>9</sub>                                                | 1027.9332                    | 13.9603      |
| v <sub>10</sub>                                  | 1107.2052                    | 0.6997       | v <sub>10</sub>                                               | 1086.7726                    | 4.0227       |
| v <sub>11</sub>                                  | 1116.1826                    | 60.2056      | v <sub>11</sub>                                               | 1111.9567                    | 0.9131       |
| v <sub>12</sub>                                  | 1132.4435                    | 10.5313      | v <sub>12</sub>                                               | 1137.1129                    | 2.2901       |
| v <sub>13</sub>                                  | 1199.1632                    | 4.5031       | v <sub>13</sub>                                               | 1159.6141                    | 3.3527       |
| v <sub>14</sub>                                  | 1256.8760                    | 0.2674       | v <sub>14</sub>                                               | 1389.1960                    | 0.8233       |
| v <sub>15</sub>                                  | 1396.6579                    | 5.0630       | v <sub>15</sub>                                               | 1425.1564                    | 14.3774      |
| v <sub>16</sub>                                  | 1433.1014                    | 0.9195       | v <sub>16</sub>                                               | 1448.8353                    | 1.2036       |
| v <sub>17</sub>                                  | 1460.5832                    | 2.7575       | v <sub>17</sub>                                               | 1465.7927                    | 14.8286      |
| v <sub>18</sub>                                  | 1477.4936                    | 9.1040       | v <sub>18</sub>                                               | 1468.5245                    | 0.0053       |
| v <sub>19</sub>                                  | 1487.7995                    | 8.9362       | v <sub>19</sub>                                               | 1487.3965                    | 9.4913       |
| v <sub>20</sub>                                  | 1497.8457                    | 0.2099       | v <sub>20</sub>                                               | 1488.6399                    | 23.4394      |
| v <sub>21</sub>                                  | 1511.7046                    | 11.5259      | v <sub>21</sub>                                               | 1526.7873                    | 14.2940      |
| v <sub>22</sub>                                  | 1650.6901                    | 34.0909      | v <sub>22</sub>                                               | 1659.5838                    | 79.5095      |
| v <sub>23</sub>                                  | 2942.0905                    | 46.2139      | v <sub>23</sub>                                               | 3031.4526                    | 0.3176       |
| v <sub>24</sub>                                  | 2950.5747                    | 105.9159     | v <sub>24</sub>                                               | 3035.2911                    | 1.5530       |
| v <sub>25</sub>                                  | 3051.9818                    | 43.5185      | v <sub>25</sub>                                               | 3117.8989                    | 0.2308       |
| v <sub>26</sub>                                  | 3054.6447                    | 30.7283      | v <sub>26</sub>                                               | 3118.8408                    | 0.0931       |
| v <sub>27</sub>                                  | 3097.9984                    | 6.0858       | v <sub>27</sub>                                               | 3156.4993                    | 0.0642       |
| v <sub>28</sub>                                  | 3103.3640                    | 44.1226      | v <sub>28</sub>                                               | 3161.0826                    | 0.6534       |
| v <sub>29</sub>                                  | 3421.1784                    | 1.7475       | v <sub>29</sub>                                               | 3513.6341                    | 121.0814     |
| v <sub>30</sub>                                  | 3498.3215                    | 0.0350       | v <sub>30</sub>                                               | 3645.6045                    | 106.4104     |



| NH <sub>2</sub> CH <sub>2</sub> CH <sub>2</sub> NH <sub>2</sub> |                              |              | NH <sub>2</sub> CH <sub>2</sub> CH <sub>2</sub> NH <sub>2</sub> <sup>+</sup> |                              |              |
|-----------------------------------------------------------------|------------------------------|--------------|------------------------------------------------------------------------------|------------------------------|--------------|
| Normal modes                                                    | Frequency(cm <sup>-1</sup> ) | IR Intensity | Normal modes                                                                 | Frequency(cm <sup>-1</sup> ) | IR Intensity |
| v <sub>1</sub>                                                  | 179.9656                     | 4.2047       | v <sub>1</sub>                                                               | 118.9283                     | 0.4519       |
| v <sub>2</sub>                                                  | 235.6987                     | 20.7799      | v <sub>2</sub>                                                               | 173.5474                     | 0.0577       |
| v <sub>3</sub>                                                  | 290.2833                     | 44.0429      | v <sub>3</sub>                                                               | 334.9658                     | 0.2470       |
| v <sub>4</sub>                                                  | 348.0012                     | 22.5367      | v <sub>4</sub>                                                               | 375.9995                     | 3.6233       |
| v <sub>5</sub>                                                  | 504.1945                     | 12.0775      | v <sub>5</sub>                                                               | 417.6388                     | 88.9136      |
| v <sub>6</sub>                                                  | 812.9440                     | 91.1544      | v <sub>6</sub>                                                               | 472.3067                     | 13.0408      |
| v <sub>7</sub>                                                  | 853.7207                     | 75.6127      | v <sub>7</sub>                                                               | 516.2050                     | 260.7918     |
| v <sub>8</sub>                                                  | 878.8733                     | 79.2875      | v <sub>8</sub>                                                               | 518.9747                     | 19.2435      |
| v <sub>9</sub>                                                  | 927.4051                     | 34.2551      | v <sub>9</sub>                                                               | 826.9022                     | 12.9578      |
| v <sub>10</sub>                                                 | 1007.0535                    | 12.4586      | v <sub>10</sub>                                                              | 865.4095                     | 4.4735       |
| v <sub>11</sub>                                                 | 1050.4762                    | 8.4471       | v <sub>11</sub>                                                              | 1030.8206                    | 9.5415       |
| v <sub>12</sub>                                                 | 1111.8972                    | 5.2103       | v <sub>12</sub>                                                              | 1073.0899                    | 0.2365       |
| v <sub>13</sub>                                                 | 1182.9452                    | 4.0095       | v <sub>13</sub>                                                              | 1116.1998                    | 0.1456       |
| v <sub>14</sub>                                                 | 1219.1725                    | 4.7418       | v <sub>14</sub>                                                              | 1219.8789                    | 1.0774       |
| v <sub>15</sub>                                                 | 1325.2989                    | 3.0479       | v <sub>15</sub>                                                              | 1282.5953                    | 69.0741      |
| v <sub>16</sub>                                                 | 1342.2669                    | 2.1699       | v <sub>16</sub>                                                              | 1290.7199                    | 7.8323       |
| v <sub>17</sub>                                                 | 1408.0343                    | 8.9275       | v <sub>17</sub>                                                              | 1351.8296                    | 3.2982       |
| v <sub>18</sub>                                                 | 1431.9029                    | 6.5813       | v <sub>18</sub>                                                              | 1355.1309                    | 2.5404       |
| v <sub>19</sub>                                                 | 1498.5561                    | 4.4343       | v <sub>19</sub>                                                              | 1498.4649                    | 10.5689      |
| v <sub>20</sub>                                                 | 1511.8609                    | 3.3838       | v <sub>20</sub>                                                              | 1500.7886                    | 3.6261       |
| v <sub>21</sub>                                                 | 1643.5125                    | 35.9144      | v <sub>21</sub>                                                              | 1669.0592                    | 61.4084      |
| v <sub>22</sub>                                                 | 1655.7046                    | 25.0305      | v <sub>22</sub>                                                              | 1673.0249                    | 61.3540      |
| v <sub>23</sub>                                                 | 2913.0618                    | 90.1722      | v <sub>23</sub>                                                              | 3094.1370                    | 6.9372       |
| v <sub>24</sub>                                                 | 2963.3322                    | 84.6318      | v <sub>24</sub>                                                              | 3100.5815                    | 0.0027       |
| v <sub>25</sub>                                                 | 3036.8892                    | 48.2593      | v <sub>25</sub>                                                              | 3192.4228                    | 0.3734       |
| v <sub>26</sub>                                                 | 3064.3194                    | 31.7873      | v <sub>26</sub>                                                              | 3196.4396                    | 0.1725       |
| v <sub>27</sub>                                                 | 3487.5711                    | 4.5441       | v <sub>27</sub>                                                              | 3555.6620                    | 303.5859     |
| v <sub>28</sub>                                                 | 3492.3403                    | 0.2313       | v <sub>28</sub>                                                              | 3566.9258                    | 70.1105      |
| v <sub>29</sub>                                                 | 3568.3256                    | 3.0076       | v <sub>29</sub>                                                              | 3674.4148                    | 121.0612     |
| v <sub>30</sub>                                                 | 3573.3657                    | 0.9236       | v <sub>30</sub>                                                              | 3674.6780                    | 59.1663      |
| H <sub>2</sub> NCH <sub>2</sub> NHCH <sub>3</sub>               |                              |              | H <sub>2</sub> NCH <sub>2</sub> NHCH <sub>3</sub> <sup>+</sup>               |                              |              |
| Normal modes                                                    | Frequency(cm <sup>-1</sup> ) | IR Intensity | Normal modes                                                                 | Frequency(cm <sup>-1</sup> ) | IR Intensity |
| v <sub>1</sub>                                                  | 155.5951                     | 3.0447       | v <sub>1</sub>                                                               | 110.8234                     | 9.5533       |
| v <sub>2</sub>                                                  | 199.3598                     | 3.9098       | v <sub>2</sub>                                                               | 136.7661                     | 3.8321       |
| v <sub>3</sub>                                                  | 256.3639                     | 43.6882      | v <sub>3</sub>                                                               | 229.1249                     | 21.1248      |

|                 |           |          |                 |           |         |
|-----------------|-----------|----------|-----------------|-----------|---------|
| v <sub>4</sub>  | 354.2506  | 2.7450   | v <sub>4</sub>  | 298.3746  | 1.4209  |
| v <sub>5</sub>  | 517.6992  | 6.6231   | v <sub>5</sub>  | 520.0678  | 99.4510 |
| v <sub>6</sub>  | 742.3573  | 133.3957 | v <sub>6</sub>  | 627.0610  | 60.7215 |
| v <sub>7</sub>  | 832.5152  | 105.1208 | v <sub>7</sub>  | 641.4707  | 76.2000 |
| v <sub>8</sub>  | 905.6845  | 8.3208   | v <sub>8</sub>  | 786.4589  | 3.2459  |
| v <sub>9</sub>  | 999.4335  | 10.5407  | v <sub>9</sub>  | 832.3506  | 14.4057 |
| v <sub>10</sub> | 1041.1852 | 13.1506  | v <sub>10</sub> | 1017.4395 | 41.2582 |
| v <sub>11</sub> | 1139.8032 | 3.4008   | v <sub>11</sub> | 1057.1552 | 6.1410  |
| v <sub>12</sub> | 1169.3373 | 64.2341  | v <sub>12</sub> | 1120.2903 | 26.2495 |
| v <sub>13</sub> | 1182.3384 | 10.8405  | v <sub>13</sub> | 1170.1044 | 9.7959  |
| v <sub>14</sub> | 1249.0761 | 8.9192   | v <sub>14</sub> | 1195.4672 | 7.1864  |
| v <sub>15</sub> | 1338.5552 | 2.4211   | v <sub>15</sub> | 1306.6047 | 9.4839  |
| v <sub>16</sub> | 1426.8185 | 24.4433  | v <sub>16</sub> | 1367.2696 | 0.9236  |
| v <sub>17</sub> | 1455.9869 | 13.7573  | v <sub>17</sub> | 1383.2562 | 31.6166 |
| v <sub>18</sub> | 1487.4081 | 12.6813  | v <sub>18</sub> | 1423.0346 | 10.0826 |
| v <sub>19</sub> | 1496.4614 | 0.8865   | v <sub>19</sub> | 1427.8173 | 31.8465 |
| v <sub>20</sub> | 1517.9698 | 3.0244   | v <sub>20</sub> | 1461.8472 | 28.6748 |
| v <sub>21</sub> | 1523.9726 | 6.8419   | v <sub>21</sub> | 1494.9044 | 12.1352 |
| v <sub>22</sub> | 1639.8778 | 30.8845  | v <sub>22</sub> | 1672.7270 | 48.4770 |
| v <sub>23</sub> | 2913.6289 | 97.5123  | v <sub>23</sub> | 2927.5904 | 60.8846 |
| v <sub>24</sub> | 2933.2343 | 115.6178 | v <sub>24</sub> | 2945.0094 | 24.0464 |
| v <sub>25</sub> | 2958.2492 | 91.4081  | v <sub>25</sub> | 3009.4568 | 4.5659  |
| v <sub>26</sub> | 3068.2083 | 37.6601  | v <sub>26</sub> | 3068.4715 | 5.5108  |
| v <sub>27</sub> | 3113.2954 | 14.8337  | v <sub>27</sub> | 3143.3810 | 20.4867 |
| v <sub>28</sub> | 3494.2785 | 0.3165   | v <sub>28</sub> | 3494.4745 | 99.8736 |
| v <sub>29</sub> | 3541.8180 | 0.3031   | v <sub>29</sub> | 3562.3324 | 83.0464 |
| v <sub>30</sub> | 3582.3946 | 0.8282   | v <sub>30</sub> | 3653.6543 | 68.2966 |
